# Supplementary material for: Bimetallic catalytic growth of boron nitride nanotubes
Source: Royal Society of Chemistry journal article supplement (doi:10.1039/c6nr08623c), 2017-01-01
Supplement: c6nr08623c1.pdf [file c6nr08623c1.pdf]

## Electronic Supporting Information

### Bimetallic Catalytic Growth of Boron Nitride Nanotubes

Liangjie Wang,<sup>a,b</sup> Taotao Li,<sup>a</sup> Xiaoyang Long,<sup>a</sup> Xiaona Wang,<sup>a</sup> Yancui Xu,<sup>a</sup> and Yagang Yao<sup>\*,a</sup>

<sup>a</sup>Division of Advanced Nanomaterials, Key Laboratory of Nanodevices and Applications, CAS Center for Excellence in Nanoscience, Suzhou Institute of Nano-tech and Nano-bionics, Chinese Academy of Sciences, Suzhou 215123, China.

\*E-mail: ygyao2013@sinano.ac.cn

<sup>b</sup>School of Materials Science and Engineering, Shanghai University, Shanghai, 200444, China

#### Synthesis of Ni-Y, Ni, and Y nanoparticles

##### Ni-Y and Ni-Mo nanoparticles

0.2 mmol of  $\text{NiCl}_2 \cdot 6\text{H}_2\text{O}$  was added into 20 mL of 10% didecyldimethylammonium bromide (DDAB)/toluene solution to form the inverse micelles. Then, 0.040 mL of 0.1 M  $\text{YCl}_3 \cdot 6\text{H}_2\text{O}$  aqueous solution was added into the micelle solution under sonication. After that, 0.8 mL of 2.0 M lithium borohydride ( $\text{LiBH}_4$ )/THF solution was added to reduce the salts into metals after bubbling with  $\text{N}_2$  and pumping the freezed solution with liquid nitrogen under low pressure to remove dissolved oxygen. The solution turned black immediately upon sonication. The experimental set-up diagram of the freezed solution by liquid nitrogen is shown in Figure 1. The Ni-Mo nanoparticles were prepared by similar method, just replacing  $\text{YCl}_3 \cdot 6\text{H}_2\text{O}$  aqueous solution with  $(\text{NH}_4)_2\text{MoO}_4$  aqueous solution.

##### Ni or Y nanoparticles

0.2 mmol of  $\text{NiCl}_2 \cdot 6\text{H}_2\text{O}$  or  $\text{YCl}_3 \cdot 6\text{H}_2\text{O}$  was added into 20 mL of 10% DDAB/toluene solution to form the inverse micelles. After that, 0.8 mL of 2.0 M  $\text{LiBH}_4$ /THF solution was added to reduce the salts into metals after bubbling with  $\text{N}_2$  to remove dissolved oxygen. The products were then dispersed in 2-propanol, drop-dried on a  $\text{SiO}_2$ /Si wafer.

##### BNNTs Growth

Different precursor materials ( $\text{B}_2\text{O}_3$  or B) were placed into an open-ended alumina tube, and located at the center of the heating zone (1200 °C) of the tube furnace. The substrates with and without bimetallic catalysts nanoparticles were faced down the alumina tube. Then, 200 standard cubic centimeter per minute (sccm) of  $\text{N}_2$  and 200 sccm of  $\text{H}_2$  were introduced into the chamber. Subsequently, the precursors were heated to 1200 °C and held for 1 h under the  $\text{NH}_3$  gas. After that,  $\text{NH}_3$  gas flow was stopped in order to terminate the reaction and the system was cooled down to room temperature under the  $\text{N}_2$  flow. We further demonstrate the effectiveness of bimetallic catalyst to grow BNNTs in another way employing a mixture of B/NiO/ $\text{Y}_2\text{O}_3$ , B/NiO, and B/ $\text{Y}_2\text{O}_3$  as precursor under the same experimental conditions.

##### Characterizations

The products were characterized by scanning electron microscope (SEM, Hitachi S-4800), atomic force

microscopy (AFM, Dimension3100), and high-resolution transmission electron microscope (TEM, Tecnai G2 F20 S-Twin) equipped with an energy-dispersive X-ray energy dispersive spectrometer (EDS, Apollo 40SDD). Raman spectroscopy was collected over the spectral range of  $1000\text{ cm}^{-1}$  to  $2000\text{ cm}^{-1}$  using LabRAM ARAMIS Raman confocal micro-scope (HORIBA JobinYvon) equipped with a wavelength of 532 nm. The crystal structure was characterized by X-ray diffraction (XRD, D8 Advance, Bruker AXS). The UV-visible absorption spectra of the products were characterized by UV-visible absorption spectroscopy (JascoV-466 Spectrophotometer).

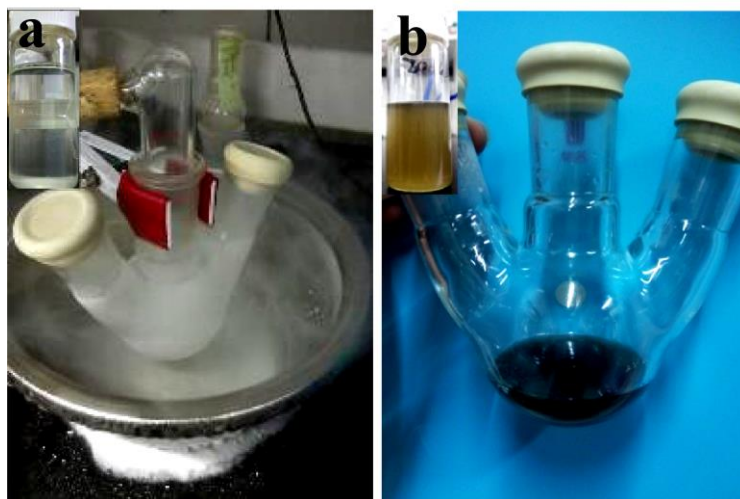

The experimental set-up diagram for metal nanoparticles preparation. (a) The two salts were freezed before  $(\text{LiBH}_4)/\text{THF}$  solution adding. (b) The photograph of nanopatrtricles in the flask.

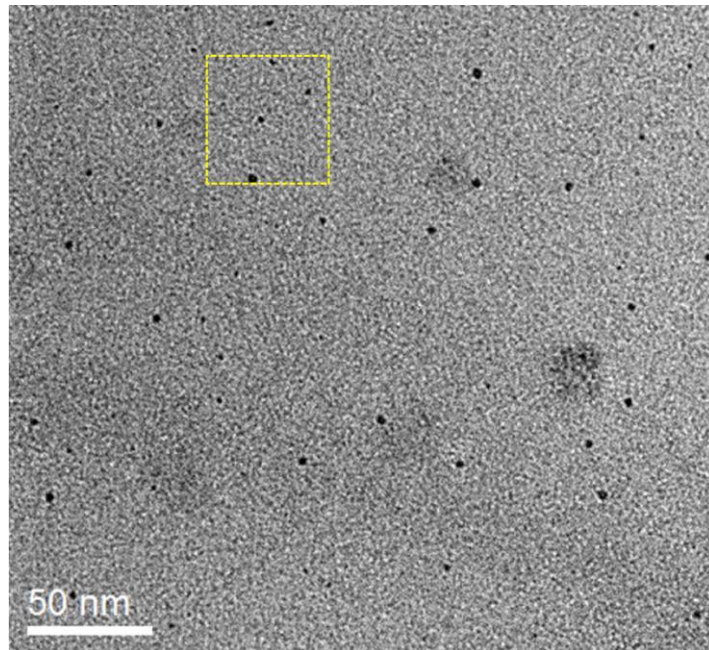

Figure S1. The TEM image of Ni-Y nanoparticles.

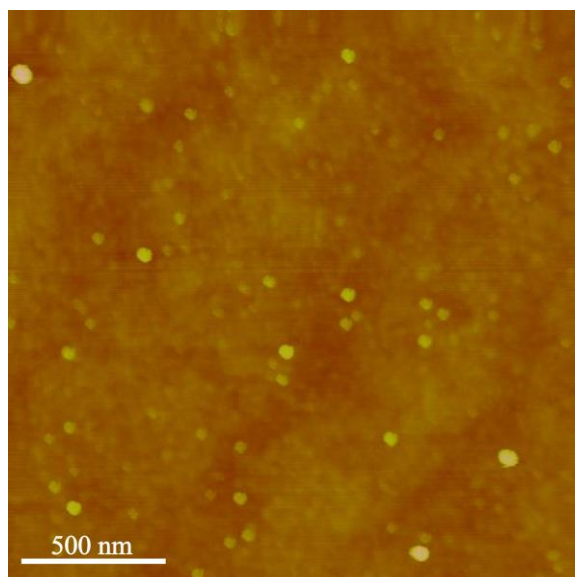

Figure S2. The magnified AFM image of as-prepared Ni-Y nanoparticles.

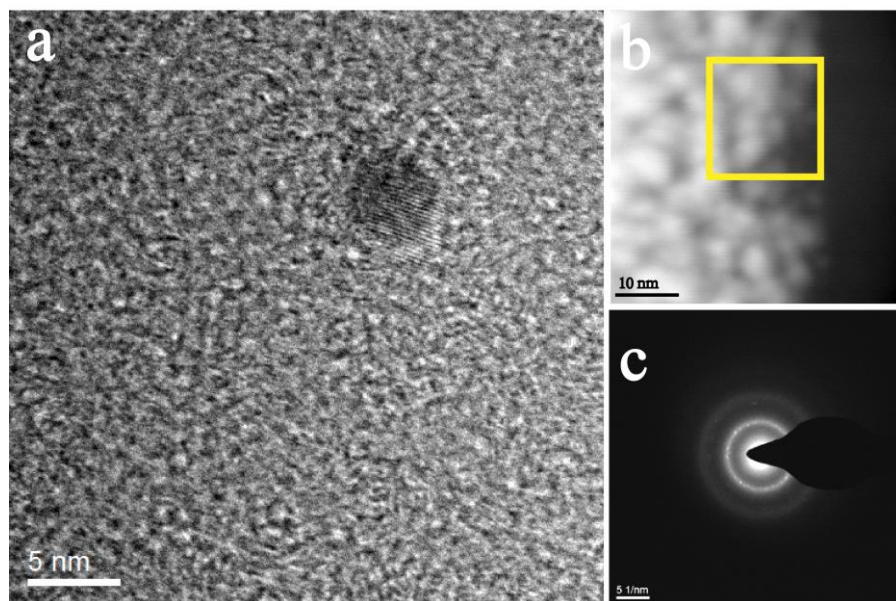

Figure S3. (a) The TEM image of Ni-Y nanoparticle. (b) The STEM image of nanoparticles and (c) the SAED pattern of several nanoparticles shown in the yellow rectangle in (b).

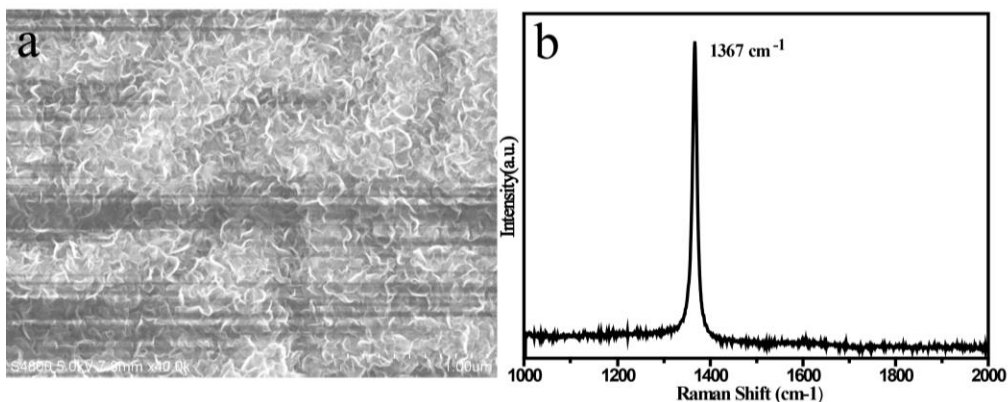

Figure S4. (a) BN nanosheets grown on the SiO<sub>2</sub>/Si surface without Ni-Y nanoparticles. (b) Raman spectra of BNNSs.

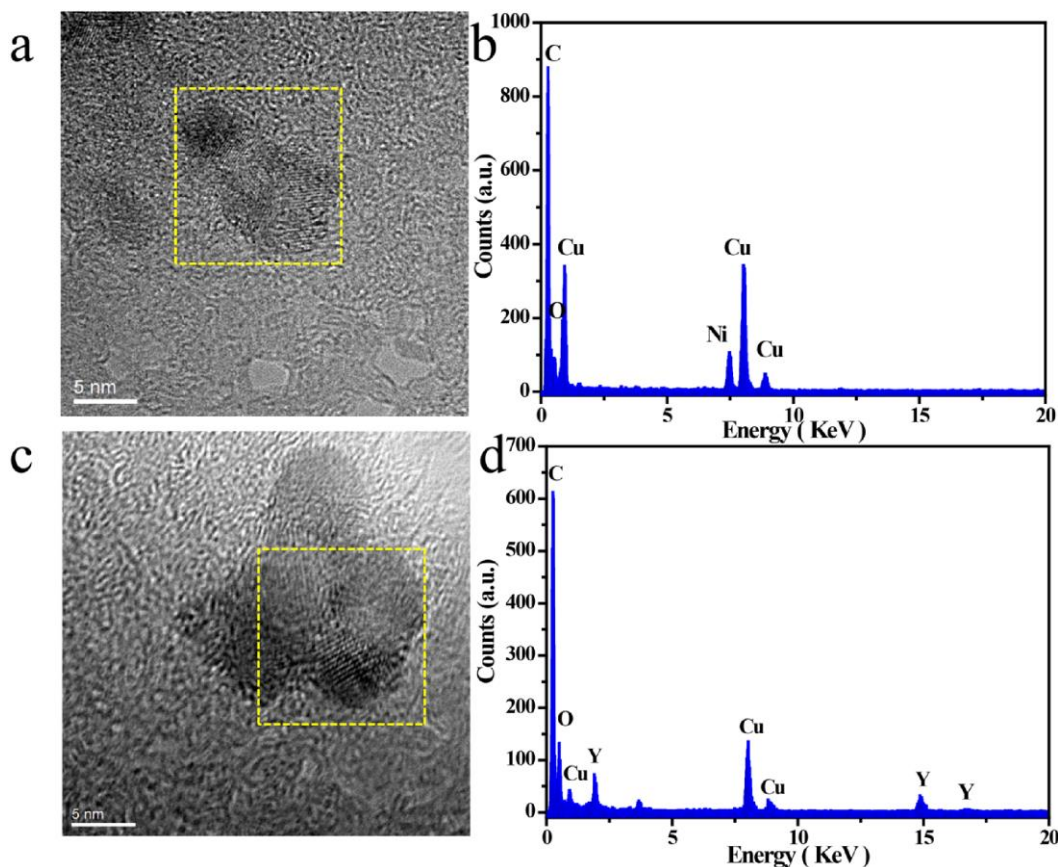

Figure S5. Ni and Y nanoparticles characterizations. (a) TEM image of Ni nanoparticles. (b) EDS spectrum of Ni nanoparticles (shown in the yellow rectangle in a). (c) TEM image of Y nanoparticles. (d) EDS spectrum of Y nanoparticles (shown in the yellow rectangle in c).

Comparing Figure 1d with S5b, we found that Ni peak at ~7.5 KeV can be discovered in Figure S5b, but Y peaks at ~1.8 and ~15 KeV are not exposed. Compare Figure 1d with S5b, we found that the Y peaks appeared in EDS spectrum as shown in Figure S5d, without Ni peaks at about 7.5 KeV. Figure 1d is EDS spectrum of the Ni-Y nanoparticles, the Ni and Y peaks appearing at the same time, which proves we successfully prepared the bimetallic nanoparticles.

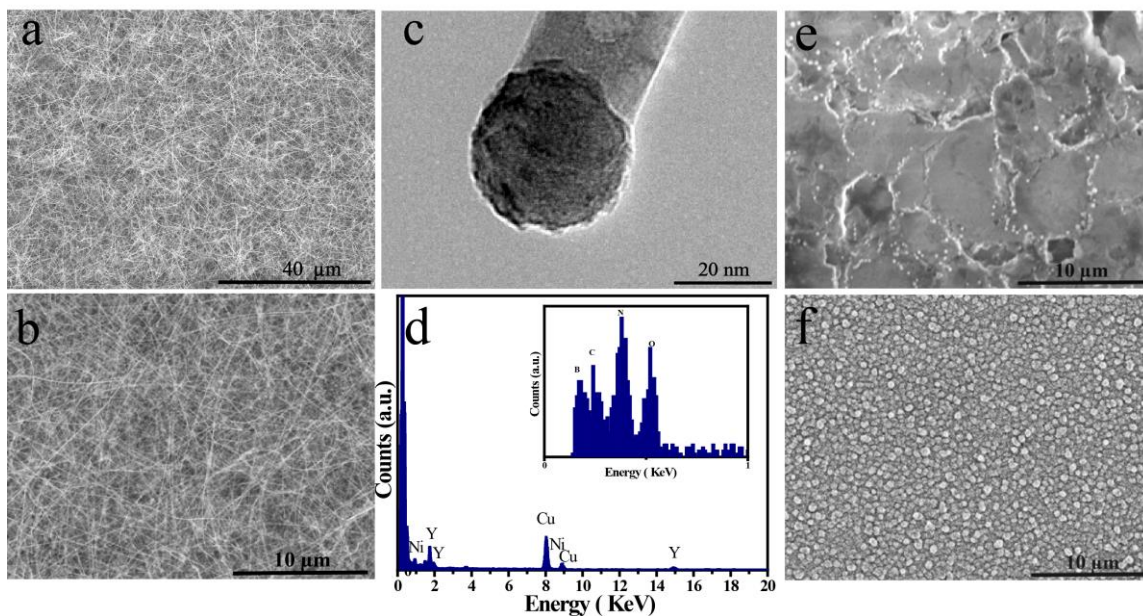

Figure S6. Morphology characterizations of as-grown BNNTs. (a) and (b) The mixture of B/Y<sub>2</sub>O<sub>3</sub>/NiO as precursor. (c) The image of close ended BNNT. (d) EDS spectrum of an encapsulated catalyst particle inside of as-grown BNNT. The inset exhibits the light elements of B, N, O and C. The presence of Cu and C signature in both the cases was attributed to the carbon-coated copper grid used in the sample preparation. (e) B/Y<sub>2</sub>O<sub>3</sub> as precursor. (f) B/NiO as precursor.
